# Supplementary material for: Intestinal Microbiota Influence Doxorubicin Responsiveness in Triple-Negative Breast Cancer
Source: Cancers (Basel). 2022 Oct 4;14(19):4849. doi: 10.3390/cancers14194849 (PMC9563306; doi:10.3390/cancers14194849)
Supplement: Supplementary file 1 [file cancers-14-04849-s001.zip › cancers-1884154-supplementary.pdf]

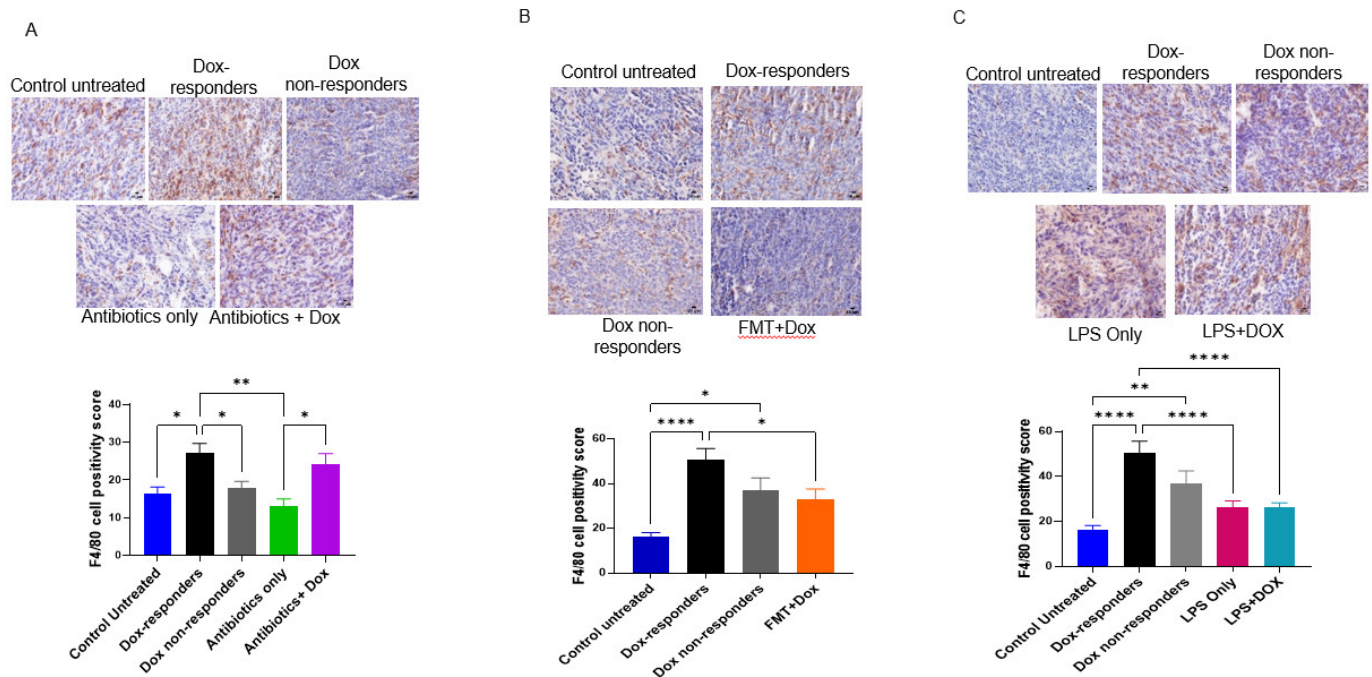

**Supplementary Figure S1: Macrophage recruitment into tumors.** **A.** Macrophage marker F4/80 shown in IHC images of tumors in a murine TNBC model.  $n=10$ ;  $*p=0.05$ ,  $**p=0.001$ . **B.** Macrophage marker F4/80 shown in IHC-stained tumors in a high-fat diet derived-FMT study TNBC murine model.  $n=5-10$ ;  $*p=0.01$ ,  $****p<0.0001$ . **C.** Macrophage marker F4/80 shown by IHC in an inflammatory TNBC murine model.  $n=7-10$ ;  $**p=0.002$ ,  $****p<0.0001$ .

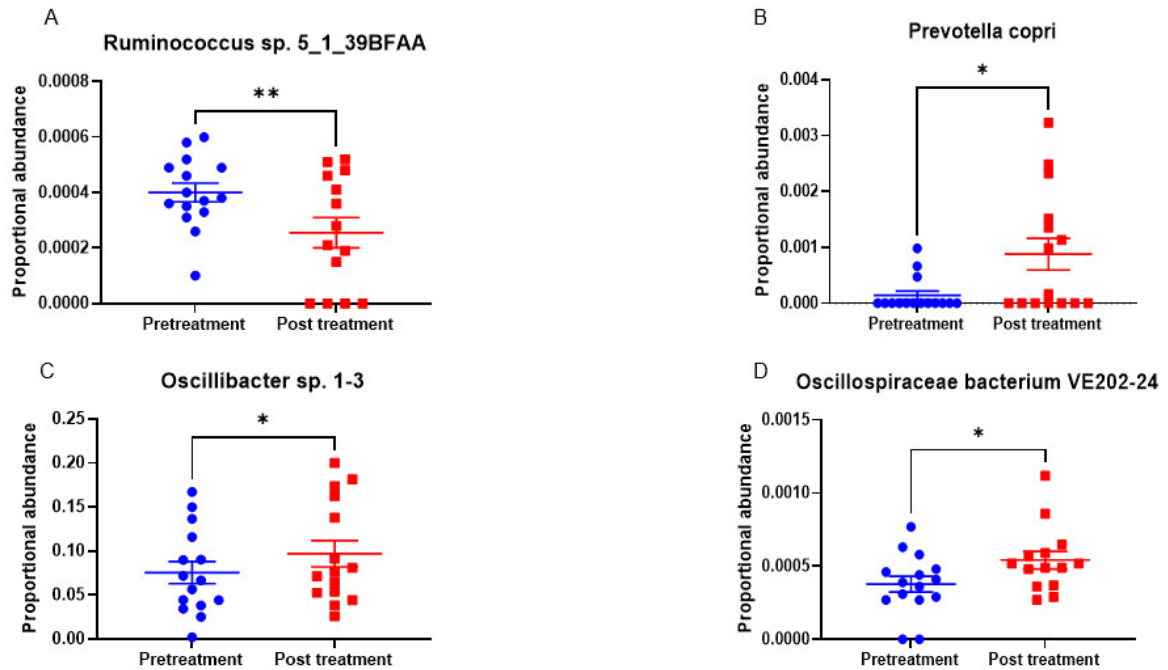

**Supplementary Figure S2: Proportional abundance of bacterial species modified post doxorubicin treatment.** **A.** *Ruminococcus* sp.5\_1\_39BFAA bacterial species were reduced after Doxorubicin treatment. n=15; \*\*p=0.005. **B.** Proportional abundance of bacterial species that increased after doxorubicin treatment, *Prevotella copri*, **C.** *Oscillibacter* sp. 1-3, **D.** *Oscillospiraceae* bacterium VE202-24. n=15; \*p=0.05.

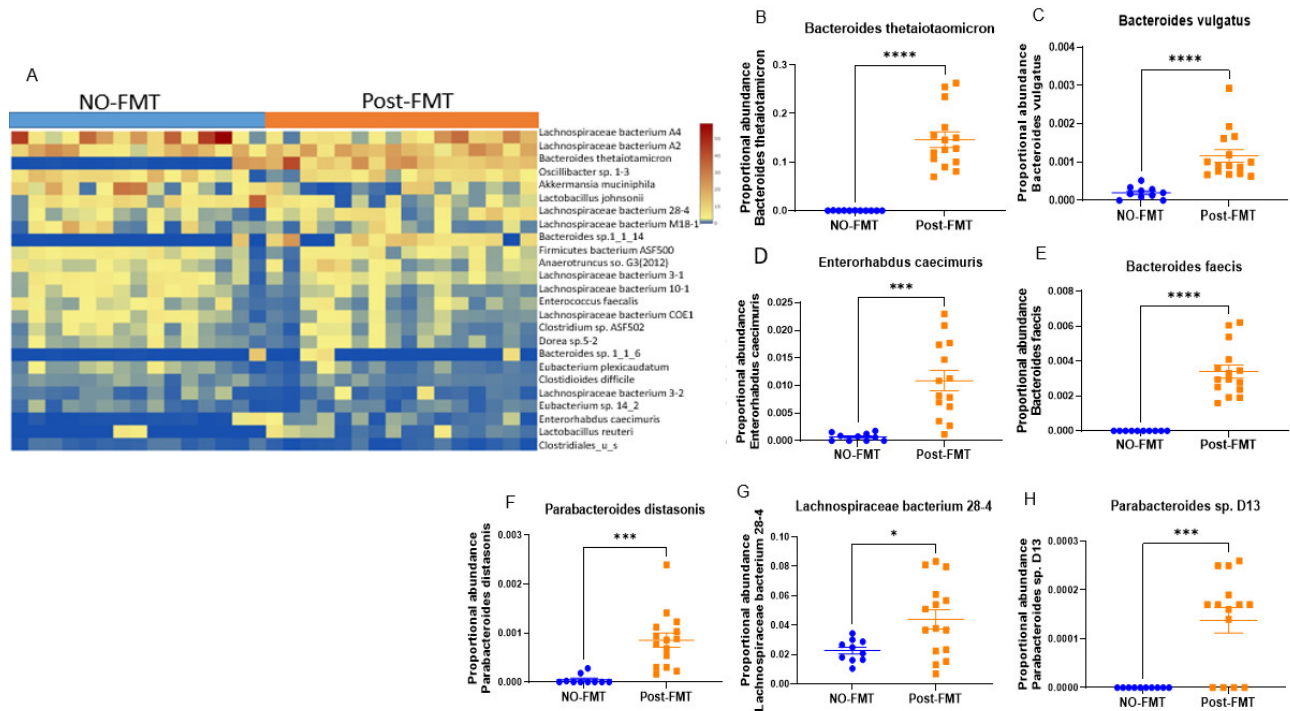

**Supplementary Figure S3: Metagenomic analysis of fecal samples showing proportional abundance of bacterial species modified after high fat diet derived-FMT. A:** Heatmap of the study groups at baseline (No-FMT) and endpoint (post-FMT). Bacterial species that modulated and increased abundance post FMT **B.** *Bacteroides thetaiotaomicron*, **C.** *Bacteroides vulgatus*, **D.** *Enterorhabdus caecimuris*, **E.** *Bacteroides faecis*, **F.** *Parabacteroides distasonis*, **G.** *Lachnospiraceae bacterium 28-4*, **H.** *Parabacteroides sp. D13*. n=10-15; \*p=0.01, \*\*\*p=0.0001, \*\*\*\*p<0.0001.

**Supplementary Table S1:** Patients' breast cancer characteristics. Data are presented as mean  $\pm$  standard deviation.

|                                                   | Pretreatment group, n=16      | Neoadjuvant chemotherapy group, n=7 |
|---------------------------------------------------|-------------------------------|-------------------------------------|
| Age, years                                        | 60.5 $\pm$ 11.2<br>(38-81)    | 61.6 $\pm$ 11.5<br>(48-77)          |
| BMI, kg/m <sup>2</sup>                            | 33.1 $\pm$ 7.4<br>(25.8-56.6) | 35.3 $\pm$ 10.2<br>(27.1-57.4)      |
| Ethnicity<br>Caucasian<br>African American        | 75%<br>25%                    | 86%<br>14%                          |
| Tumor classification<br>Ductal                    | 100%                          | 100%                                |
| Tumor receptor status<br>ER+/PR+<br>HER2+<br>TNBC | 12.5%<br>25%<br>62.5%         | 0%<br>43%<br>57%                    |
